# Supplementary material for: Tea-Waste-Mediated Magnetic Oxide Nanoparticles as a Potential Low-Cost Adsorbent for Phosphate (PO43−) Anion Remediation
Source: MDPI journal article supplement (doi:10.3390/w15203541), 2023-10-11
Supplement: s1 [file s1]

Archive with 1 entries (1 files):
- water-2630957-supplementary.pdf
