# Supplementary material for: Tea-Waste-Mediated Magnetic Oxide Nanoparticles as a Potential Low-Cost Adsorbent for Phosphate (PO43−) Anion Remediation
Source: MDPI journal article supplement (doi:10.3390/w15203541), 2023-10-11
Supplement: s1 [file s1 › water-2630957-supplementary.pdf]

# Tea-Waste-Mediated Magnetic Oxide Nanoparticles as a Potential Low-Cost Adsorbent for Phosphate ( $\text{PO}_4^{3-}$ ) Anion Remediation

Khizar Hussain Shah <sup>1</sup>, Misbah Fareed <sup>2</sup>, Muhammad Waseem <sup>1</sup>, Shabnam Shahida <sup>3</sup>, Mohammad Rafe Hatshan <sup>4</sup>, Sadaf Sarfraz <sup>5</sup>, Aneeqa Batool <sup>2</sup>, Muhammad Fahad <sup>6</sup>, Tauqeer Ahmad <sup>7</sup>, Noor S. Shah <sup>8</sup>, Kyungeun Ha <sup>9</sup> and Changseok Han <sup>9,10,\*</sup>

<sup>1</sup> Department of Chemistry, COMSATS University Islamabad (Islamabad Campus), Islamabad 45000, Pakistan; khizar\_nce@yahoo.com (K.H.S.); waseem\_atd@yahoo.com (M.W.)

<sup>2</sup> Department of Chemistry, COMSATS University Islamabad (Abbottabad Campus), Abbottabad 22060, Pakistan; misbah.fareed1234@gmail.com (M.F.); aneeqabatool196@gmail.com (A.B.)

<sup>3</sup> Department of Chemistry, Faculty of Applied and Basic Sciences, University of Poonch, Rawalakot 12350, Pakistan; shabnamshahida01@gmail.com

<sup>4</sup> Department of Chemistry, College of Science, King Saud University, P.O. Box 2455, Riyadh 11451, Saudi Arabia; mhatshan@ksu.edu.sa

<sup>5</sup> Department of Chemistry, Lahore Garrison University, Lahore 54000, Pakistan; sadaf\_sarfraz@hotmail.com

<sup>6</sup> Department of Electrical and Computer Engineering, COMSATS University Islamabad, (Abbottabad Campus), Abbottabad 22060, Pakistan; drmuhammadfahad@gmail.com

<sup>7</sup> Department of Chemistry, University of Mianwali, Mianwali 42200, Pakistan; tskp72@yahoo.com

<sup>8</sup> Department of Environmental Sciences, COMSATS University Islamabad, (Vehari Campus), Vehari 61100, Pakistan; noorsamad@cuivehari.edu.pk

<sup>9</sup> Program in Environmental & Polymer Engineering, Graduate School, INHA University, Incheon 22212, Republic of Korea; kyungeunha0402@gmail.com

<sup>10</sup> Department of Environmental Engineering, INHA University, Incheon 22212, Republic of Korea

\* Correspondence: hanck@inha.ac.kr

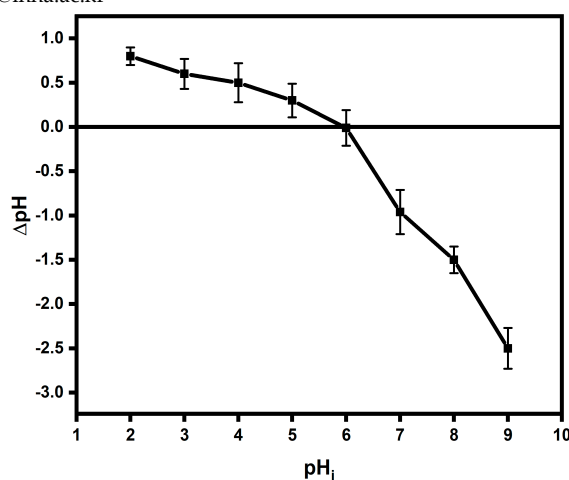

Figure S1. Plot for PZC for TW-Fe<sub>3</sub>O<sub>4</sub>.

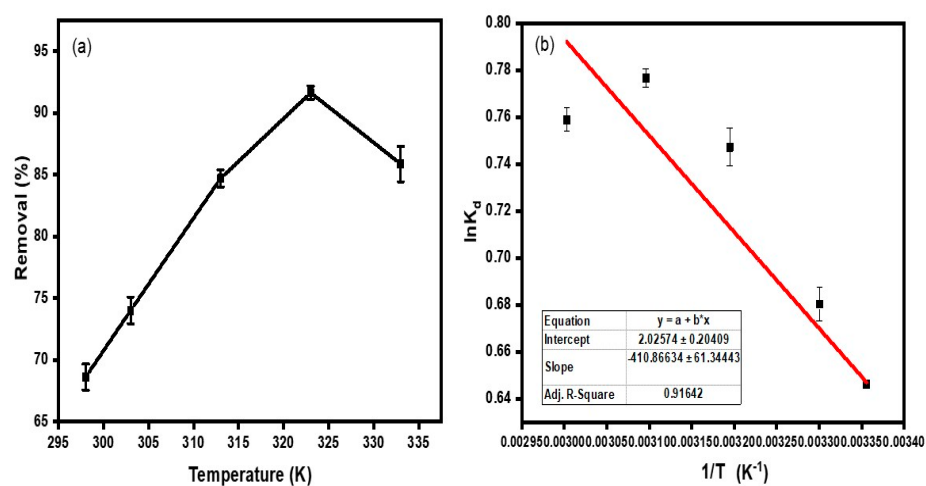

**Figure S2.** Effect of temperature and Van 't Hoff Plot for removal of  $\text{PO}_4^{3-}$  ions by TW- $\text{Fe}_3\text{O}_4$

**Table S1.** Equilibrium parameters for adsorption of  $\text{PO}_4^{3-}$  ions by TW- $\text{Fe}_3\text{O}_4$  adsorbent

| Adsorption Isotherm            | Parameters                                   |              |
|--------------------------------|----------------------------------------------|--------------|
|                                | $K_L$ (L/mg)                                 | $q_m$ (mg/g) |
| Langmuir Adsorption Isotherm   | 0.0221                                       | 227.27       |
|                                | $R^2$                                        | 0.9460       |
|                                | $K_F$ (mg/g)                                 | n            |
| Freundlich Adsorption Isotherm | 3.5704                                       | 1.849        |
|                                | $R^2$                                        | 0.9874       |
|                                | $\beta$ (mol <sup>2</sup> /kJ <sup>2</sup> ) | $q_m$ (mg/g) |
| Dubinin-Radushkevich (DRK)     | $4 \times 10^{-8}$                           | 1.358        |
| Model                          | $R^2$                                        | 0.8506       |
